## 1 **Triple visual hemifield maps in optic chiasm hypoplasia**

2 Khazar Ahmadi<sup>1</sup>, Alessio Fracasso<sup>2,3,4,5,†</sup>, Robert J. Puzniak<sup>1,†</sup>, Andre D. Gouws<sup>6</sup>, Renat  
3 Yakupov<sup>7,8</sup>, Oliver Speck<sup>7,8,9,10</sup>, Joern Kaufmann<sup>11</sup>, Franco Pestilli<sup>12</sup>, Serge O. Dumoulin<sup>2,4,13</sup>,  
4 Antony B. Morland<sup>6,14</sup> & Michael B. Hoffmann<sup>1,10,\*</sup>

5 <sup>1</sup>Department of Ophthalmology, Otto-von-Guericke University, Magdeburg, 39120, Germany;

6 <sup>2</sup>Department of Experimental Psychology, Helmholtz Institute, Utrecht University, Utrecht, 3584

7 CS, The Netherlands; <sup>3</sup>Department of Radiology, University Medical Center Utrecht, Utrecht,

8 3584 CX, The Netherlands; <sup>4</sup>Spinoza Centre for Neuroimaging, Amsterdam, 1105 BK ,The

9 Netherlands; <sup>5</sup>Institute of Neuroscience and Psychology, University of Glasgow, Glasgow, G12

10 8QB, UK; <sup>6</sup>Department of Psychology, York Neuroimaging Centre, University of York, York,

11 YO10 5NY, UK; <sup>7</sup>Department of Biomedical Magnetic Resonance, Institute for Physics, Otto-

12 von-Guericke University, Magdeburg, 39120, Germany; <sup>8</sup>German Center for Neurodegenerative

13 Diseases, Magdeburg, 39120, Germany; <sup>9</sup>Leibniz Institute for Neurobiology, Magdeburg, 39118,

14 Germany; <sup>10</sup>Center for Behavioral Brain Sciences, Magdeburg, 39106, Germany; <sup>11</sup>Department of

15 Neurology, Otto-von-Guericke-University, Magdeburg, 39120, Germany; <sup>12</sup>Department of

16 Psychological and Brain Sciences, Indiana University, Bloomington, IN, 1101 E, USA;

17 <sup>13</sup>Department of Experimental and Applied Psychology, VU University Amsterdam, Amsterdam,

18 1081 BT, The Netherlands; <sup>14</sup>Centre for Neuroscience, Hull-York Medical School, University of

19 York, York, YO10 5DD, UK

20 †These authors contributed equally.

21 \*Correspondence:

22 Michael B. Hoffmann

23 Department of Ophthalmology, Visual Processing Laboratory, Leipziger Str. 44, 39120,

24 Magdeburg, Germany

25 Email: [michael.hoffmann@med.ovgu.de](mailto:michael.hoffmann@med.ovgu.de)

26

27

28 **Abstract**

29 In humans, each hemisphere comprises an overlay of two visuotopic maps of the contralateral  
30 visual field, one from each eye. Is the capacity of the visual cortex limited to these two maps or  
31 are plastic mechanisms available to host more maps? Using an integrative approach of  
32 submillimeter fMRI, diffusion-weighted imaging and population receptive field mapping, we  
33 found three hemiretinal inputs to converge onto the left hemisphere in a rare individual with  
34 chiasma hypoplasia. This generates extremely atypical responses in striate and extrastriate  
35 cortices, specifically an overlay of three hemifield representations. Unexpectedly, the effects of  
36 this large abnormality on visual function in daily life are not easily detected. We conclude that  
37 developmental plasticity including the re-wiring of local intra- and cortico-cortical connections is  
38 pivotal to support the coexistence and functioning of three hemifield maps within one  
39 hemisphere.

40 **Keywords:** Diffusion imaging, fMRI, optic chiasm, plasticity, retinotopy, visual cortex

41

## 42 **Introduction**

43 Topographic maps of the contralateral visual field are instrumental for the functionality of the  
44 human visual cortex and are considered a core principle of the notion of hemispheric  
45 specialization (Huberman et al., 2008; Wandell et al., 2007). A fundamental prerequisite for the  
46 formation of these maps is the partial decussation of the optic nerves at the optic chiasm. Here the  
47 fate of axons from the eyes is decided such that axons from the nasal retina cross the midline and  
48 project to the contralateral hemisphere, while fibers from the temporal retina remain uncrossed  
49 and project ipsilaterally. As a consequence of this partial decussation, each hemisphere receives  
50 binocular input from the contralateral visual field. While acquired damage to the optic chiasm  
51 results in bitemporal hemianopia (Weber and Landau, 2013), congenital chiasma malformations  
52 leave major aspects of visual function intact (Hoffmann et al., 2007; Hoffmann and Dumoulin,  
53 2015; Klemen et al., 2012). This renders these conditions invaluable models for the study of the  
54 foundations of visual pathway formation and the scope of its plasticity in humans.

55 In individuals affected with congenital chiasmatic abnormalities [absence of optic nerve crossing  
56 in achiasma and hemihydranencephaly (Apkarian et al., 1994; Fracasso et al., 2016; Hoffmann et  
57 al., 2012; Muckli et al., 2009; Victor et al., 2000) or enhanced crossing in FHONDA and  
58 albinism (Ahmadi et al., 2018; Apkarian et al., 1983; Hoffmann et al., 2003; von dem Hagen et  
59 al., 2008)], the visual cortex receives erroneous input from the ipsilateral visual field in addition  
60 to the normal input from the contralateral visual field. This results, at the macroscopic scale, in  
61 two superimposed retinotopic maps of opposing hemifields in V1 (Ahmadi et al., 2018; Bao et  
62 al., 2015; Davies-Thompson et al., 2013; Hoffmann et al., 2012, 2003; Kaule et al., 2014; Muckli  
63 et al., 2009). Remarkably, at the mesoscopic scale, these maps are interdigitated and form  
64 hemifield dominance domains (Olman et al., 2016), that are reminiscent of the ocular dominance  
65 domains in the normal visual system. It appears therefore that the reassignment of ocular  
66 dominance domains to hemifield dominance domains is a simple mechanism to accommodate  
67 two hemifield maps, either two representations of one visual hemifield via binocular input in  
68 normal vision or two representations of opposing hemifields via monocular input in congenital  
69 chiasma malformations (Hoffmann and Dumoulin, 2015).

70 These observations prompt the important question, whether V1 is limited to hosting two  
71 hemifield maps, or whether the scope of plasticity in human V1 allows for the accommodation of  
72 even more maps. We identified an individual with an extremely rare type of chiasma hypoplasia  
73 that allowed us to address this question. Three types of investigations were performed using 3

74 and 7 Tesla MRI: (i) diffusion-weighted imaging (DWI) to specify the projection error of the  
75 optic nerves at the optic chiasm, (ii) population receptive field (pRF) mapping (Ahmadi et al.,  
76 2018; Dumoulin and Wandell, 2008) to determine the cortical visual field maps, and (iii)  
77 submillimeter fMRI to examine the cortical fine-grain structure. Our results demonstrate that  
78 three hemifield maps can be accommodated within a single V1. We propose that mechanisms of  
79 developmental plasticity that are exceeding the simple reassignment of ocular dominance  
80 domains to hemifield dominance domains enable these three maps to be hosted in V1.

## 81 **Results**

### 82 *Case description*

83 A 26-year-old female with chiasma hypoplasia ('CHP') participated in the study. Her best-  
84 corrected decimal visual acuity (Snellen acuity) was 0.63 (20/32) for the dominant right eye and  
85 0.25 (20/80) for the left eye. She had moderate vertical nystagmus, strabismus [alternating  
86 strabismus, esotropia (5°), and vertical deviation (7°) with alternating suppression of each eye]  
87 and no stereoscopic vision. Humphrey-like visual field testing (see Methods) revealed normal  
88 visual fields in both eyes. Decussation anomalies were confirmed with visual evoked potentials  
89 (VEPs) and T1-weighted MRI at the age of 22. She reported an otherwise normal developmental  
90 and medical history and there was no family history of ophthalmological or neurological  
91 disorders.

### 92 *Atypical lateralization pattern revealed by submillimeter fMRI data*

93 Submillimeter fMRI at 7T was used to evaluate the cortical lateralization pattern in response to  
94 bilateral contrast reversing black and white checkerboards presented to each eye separately (see  
95 Methods). In a neuro-typical visual system, bilateral stimulation of each eye leads to  
96 bihemispheric activation (Figure S1). In CHP, however, bilateral stimulation of the left eye  
97 yielded predominant responses on the ipsilateral occipital cortex i.e. on the left hemisphere, and  
98 only a marginal activation was observed on the contralateral hemisphere. In contrast,  
99 considerable bilateral activation was found during bilateral stimulation of the right eye, indicating  
100 that part of the nasal afferents decussate at the chiasm and project to the contralateral hemisphere  
101 (Figure 1). This revealed that the misrouting pattern in CHP is distinct from complete achiasma  
102 where bilateral stimulation of each eye results in complete ipsilateral activation.

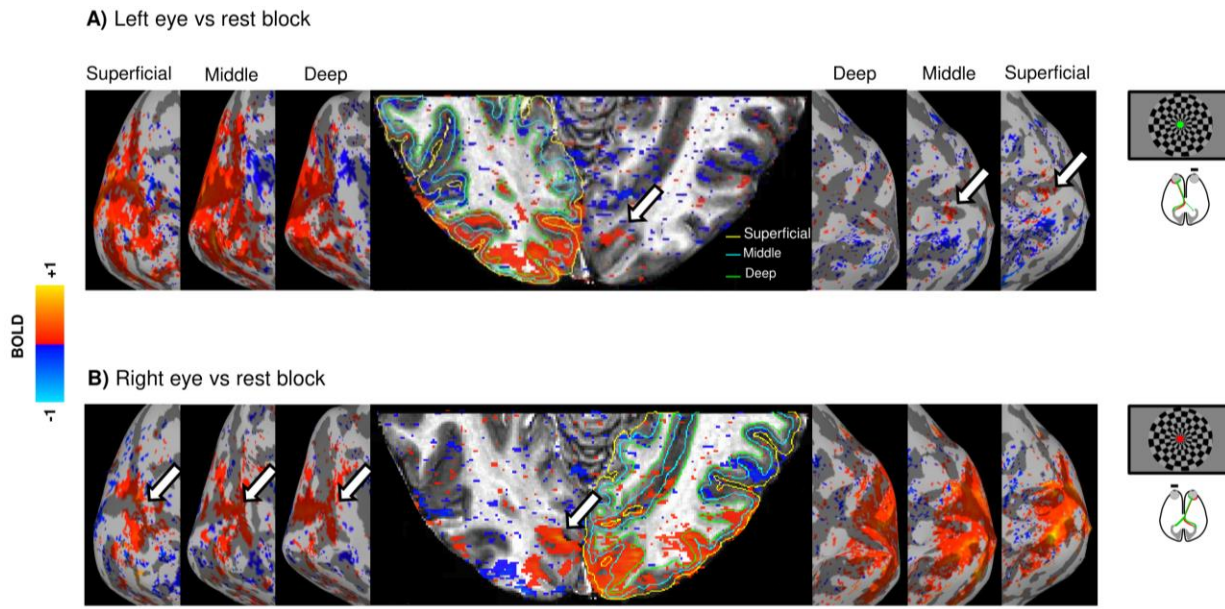

103  
104 **Figure 1. Cortical response lateralization during bilateral stimulation of each eye in CHP.**  
105 The cortical activation is projected onto a clipped anatomical image of the occipital cortex and  
106 onto the inflated cortical surfaces of the deep, middle, and superficial layers. **A)** Left eye  
107 stimulation vs rest elicits predominantly unilateral activation on the ipsilateral hemisphere with a  
108 small residual activation on the contralateral hemisphere, indicated by white arrows. **B)** Right eye  
109 stimulation vs rest elicits bilateral activation, i.e. on the ipsilateral hemisphere and also on part of  
110 the contralateral hemisphere (white arrows). The activation maps consist of signal amplitude  
111 expressed as the  $\beta$  coefficient from the general linear model (GLM) thresholded by cluster size  
112 and mean Student's T statistic (cluster = 20, threshold by  $T = 1.98$ ,  $p = 0.05$ , uncorrected).

### 113 **Optic nerve misrouting revealed with DWI**

114 The above results predicted that the proportion of crossing fibers from the right eye would exceed  
115 that from the left eye. More direct evidence for this specific misrouting of the optic nerves in  
116 CHP was provided by a quantitative assessment of the streamlines at the optic chiasm based on  
117 DWI data (see Methods). For CHP and 8 individuals of a control cohort, a total of four regions of  
118 interest (ROIs) were selected, one in each of the two optic nerves and one in each of the two optic  
119 tracts, to identify streamlines connecting each optic nerve with the (i) ipsilateral and (ii)  
120 contralateral optic tract, i.e. uncrossed and crossed projections. The proportion of the uncrossed,  
121 i.e. ipsilateral, projections was similar for the right and left optic nerves in both CHP (42% vs  
122 58%) and controls (53% vs 47%). In contrast, the proportion of the crossed, i.e. contralateral,  
123 projections was greater for the right than for the left eye in CHP (73% vs 27%) but was balanced  
124 for controls (49% vs 51%). This underscores the asymmetric distribution of crossing afferents at  
125 the optic chiasm in CHP, which is in accordance with the above fMRI findings. A 3D rendering  
126 of the tracked streamlines is illustrated in Figure 2.



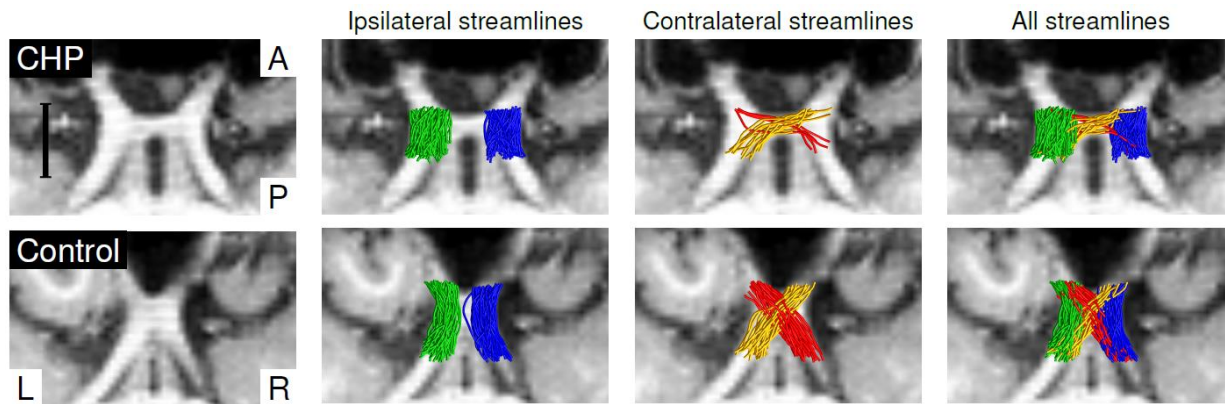

127  
128 **Figure 2. Tractography of the optic chiasm.** Axial slices without and with tractography  
129 overlay. The scale bar represents 1 cm. L-R and A-P stand for left-right and anterior-posterior  
130 directions, respectively. **Top row)** in CHP, the ipsilaterally projecting streamlines (blue and  
131 green for right and left optic nerve, respectively) are largely symmetrically distributed, while  
132 there is a predominance of contralaterally projecting streamlines for the right compared to the left  
133 optic nerve (yellow and red, respectively). **Bottom row)** in the control participant, both ipsi- and  
134 contralaterally projecting streamlines of the right and left optic nerves are largely symmetrically  
135 distributed. For clarity, only 0.25% of the generated streamlines are rendered.  
136

### 137 **Three overlaid hemifield representations revealed by pRF mapping**

138 Based on the response lateralization pattern observed in the submillimeter fMRI data, we  
139 speculated that a significant part of the visual cortex on the left occipital lobe receives input from  
140 three hemiretinae, from the two hemiretinae of the ipsilateral, i.e. left, eye and from the nasal  
141 hemiretina of the contralateral, i.e. right eye. To test this hypothesis and to determine the specific  
142 mapping of the three inputs, pRF mapping (Dumoulin and Wandell, 2008) was performed during  
143 monocular stimulation of each eye and hemifield separately (see Methods). In the control  
144 participant, visuotopic maps of each hemifield were found on the contralateral hemisphere (see  
145 Figure S2). Remarkably, stimulation of the left eye in CHP revealed orderly organized  
146 eccentricity and polar angle maps of both ipsi- and contralateral hemifields on the left hemisphere  
147 across the three early visual areas (V1-V3; Figure 3 A & B). Left and right hemifield  
148 representations were superimposed within each visual area in a mirror-symmetrical manner, in  
149 accordance with previous reports of complete achiasma (Hoffmann et al., 2012; Kaule et al.,  
150 2014). There was a small normal representation along the horizontal meridian on the  
151 contralateral, i.e. right, hemisphere. For hemifield mapping of the right eye in CHP, a similar  
152 picture was obtained, i.e. mirror-symmetrical superposition of orderly visuotopic maps of  
153 opposing hemifields (Figure 3 C & D). Importantly, the residual normal representation from the

154 right eye was much more extensive than that from the left eye (Figure 3D), which is consistent  
155 with the above submillimeter fMRI and DWI findings. Notably, this residual normal  
156 representation appeared to be superimposed onto the other two maps from the left eye (Figure 3  
157 A & B). As shown in Figure 3D, the residual normal representation of the right hemifield covered  
158 a large part of V1 and spanned the entire polar angle range, from the lower vertical meridian in  
159 the dorsal portion of V1, through the horizontal and to the upper vertical meridian in the ventral  
160 portion of V1 and thus followed the normal retinotopic pattern. The observed retinotopic pattern  
161 of this residual input was not restricted to V1 and partially spread to V2 and V3. In conclusion,  
162 we found a superposition of three retinotopic representations i.e., two representations from  
163 opposing visual hemifields mediated by the left eye plus an additional representation of the  
164 contralateral hemifield from the right eye, in the left hemisphere of CHP. This is in contrast to the  
165 retinotopic organization of the neuro-typical visual system where each hemifield is represented  
166 on the contralateral hemisphere (Figure S2). A summary of this finding is provided in Figure 4  
167 which illustrates the co-localization of three retinotopic representations in the left visual cortex of  
168 CHP. This prompted the question of the functional characteristics and the fine-structure of these  
169 maps in V1 and beyond.

### 170 **Responsivity of the visual cortex receiving triple hemifield input**

171 To compare the activation of the early visual cortex across the three hemifield-mapping  
172 conditions and to assess how the activation is propagated from V1 to V2 and V3, we determined  
173 the area of activated cortex in the early areas of the left hemisphere. As a reference, we used the  
174 condition of contralateral hemifield mapping via the left, i.e. ipsilateral, eye (normal input) for  
175 normalization and thus determined the relative activated area for both ipsilateral hemifield  
176 mapping via the left eye (abnormal input) and contralateral hemifield mapping via the right eye  
177 (residual normal input). The normal and abnormal inputs from the left eye activate a similar  
178 expanse of V1, V2 and V3. In contrast, the residual normal input from the right eye activates  
179 smaller proportions of V1, V3, and specifically V2 (Figure 5A). Subsequently, we obtained a  
180 measure of the reliability of the input for the ROIs that comprise the overlay of the three  
181 hemifield representations ( $ROI_{3maps}$ ). For this purpose, we determined the goodness of fit of the  
182 pRF model, i.e. mean variance explained (VE; Figure 5B). Although the area of cortex mapping  
183 the residual contralateral input of the right eye is smaller, the VE associated with this input does  
184 not appear to be markedly reduced compared to those driven by the normal and abnormal inputs  
185 of the left eye. These findings indicate the propagation of the triple hemifield input from V1 to

186 the extrastriate cortex. The assessment of pRF-size properties and V1-referred connective field  
187 (CF) estimates in V2 and V3 suggest that the cortico-cortical connectivity underlying this  
188 propagation might be altered in CHP (see Figure S3).

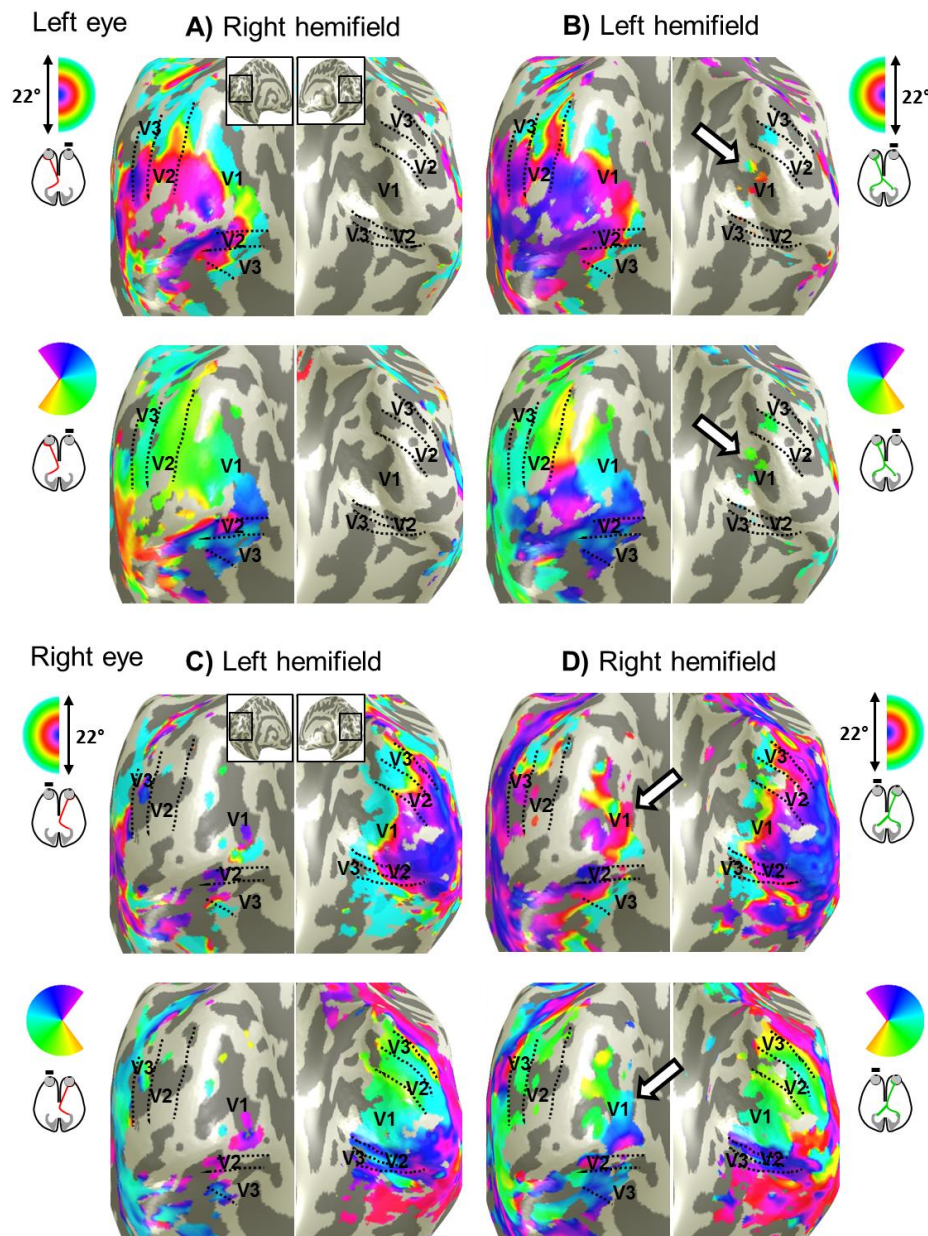

189  
190 **Figure 3. Visual field representations for hemifield pRF-mapping in CHP for right and left**  
191 **eye stimulation.** Eccentricity (top row in each panel) and polar angle (bottom row in each panel)  
192 maps are depicted on the inflated occipital cortex of CHP. For left eye stimulation, orderly  
193 eccentricity and polar angle maps are obtained on left hemisphere for both right and left  
194 hemifield stimulation (A, B) and vice versa for right eye stimulation (C, D). In addition, there is  
195 normal input to the hemisphere contralateral to the stimulated eye (white arrows). It is small for



196 left eye stimulation and sizable for right eye stimulation, where it spans the entire polar angle  
197 range.

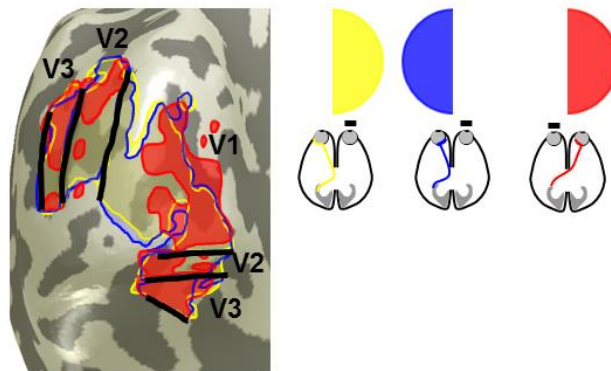

198  
199 **Figure 4. Overlapping representation of the input from three hemifields in the left occipital**  
200 **lobe of CHP** (based on the data shown in Figure 3). The portions of visual cortex activated by  
201 stimulation of the left and right hemifield via the left eye [as typical for complete achiasma  
202 (Hoffmann et al., 2012)], colored yellow and blue, and of the right hemifield (as specific to the  
203 present case of CHP), colored red, are arranged as transparent overlays and combined into a  
204 single inflated representation of the occipital lobe.

205

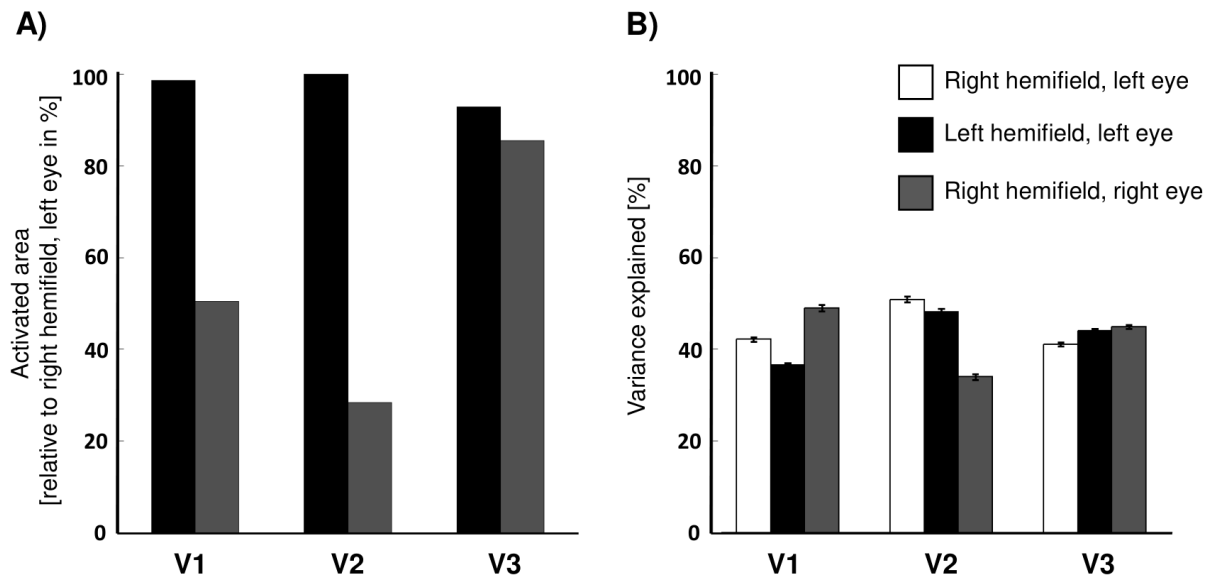

206  
207 **Figure 5. Activated area and goodness of pRF model fit across left hemisphere V1-V3. A)**  
208 Activated area (normalized with respect to right hemifield, left eye stimulation condition) of left  
209 V1-V3 for left hemifield stimulation of the left eye (black bars) and right hemifield stimulation of  
210 the right eye (gray bars). For left hemifield stimulation of the left eye, the activated area of the  
211 left V1-V3 does not decrease below 92%. For the right hemifield stimulation of the right eye, the  
212 relative activated area of V1, V2 and, V3 is smaller, covering 50%, 28%, and 85%, respectively.  
213 **B)** Comparison of the goodness of fit, i.e. mean variance explained (VE)  $\pm$  SEM, of the pRF

214 model between right and left hemifield stimulation of the left eye (white and black bars) and right  
215 hemifield stimulation of the right eye (gray bars) in V1-V3 restricted to the overlapping area of  
216 the three maps ( $ROI_{3maps}$ ). The VE for all three maps is relatively similar in V1 and V3 ranging  
217 from (49-37%) and (41-45%), respectively. For V2 it is reduced to 34% for the right hemifield  
218 right eye condition.

219

## 220 **Distinct neuronal populations with preference to left or right eye revealed by laminar** 221 **analysis**

222 To assess the fine-grain structure of the left V1 in CHP, which receives triple input from both  
223 hemifields, we revisited the submillimeter fMRI data. The differential responses to left and right  
224 eye stimulation were visualized on an anatomical image and across the cortical surface at  
225 multiple sampling depths (see Methods). Alternating and elongated patches were observed in an  
226 anterior ROI, ( $ROI_{signal}$ ), drawn in the banks of the calcarine sulcus, demonstrating a differential  
227 preference for the left or the right eye (Figure 6A). The width of these patches was between 1 to 5  
228 mm. This variation is expected due to the effects of fMRI, namely, BOLD blur on cortical  
229 sampling and subsequent aliasing. To test the reproducibility, the data were split into two halves  
230 i.e. odd and even scans and the analysis was repeated for each half. Similar clustered patterns  
231 were observed for both halves, demonstrating scan-to-scan consistency (Figure S4). It should be  
232 noted that based on the current data, we cannot infer the spatial segregation of the ocular  
233 dominance domains even though the finer patches, specifically observed in the deep layer  
234 (Figures 6A and S4), provide an indication of these domains.

235 Furthermore, to quantitatively assess the presence of neural populations with ocular preference, a  
236 selectivity index ( $I_{selectivity}$ ) was derived from the data, according to the approach used in previous  
237 studies (Kemper et al., 2018; Olman et al., 2016). It was defined as the difference between the  
238 responses to left and right eye stimulation divided by the sum of the responses to the visual  
239 stimuli (see Methods). In addition to the signal ROI, ten ROIs ( $ROI_{noise}$ ) were drawn at different  
240 regions of occipito-temporal cortex, where no ocular dominance domains are expected (see  
241 Figure 6B, left panel). The selectivity index was compared between  $ROI_{signal}$  and each  $ROI_{noise}$   
242 using receiver operating characteristic (ROC) analysis across superficial, middle and deep layers.  
243 An additional comparison was also performed between the selectivity in  $ROI_{signal}$  and the  
244 averaged selectivity of all the ten  $ROI_{noise}$ . As illustrated in Figure 6B, the average selectivity  
245 index for all three layers was above chance level (area under curve (AUC) for deep layer =

246 0.5527, AUC for middle layer = 0.5689, and AUC for superficial layer = 0.5835). This suggests  
247 the segregation of two neuronal populations with preference to the left or the right eye,  
248 predominantly in the vicinity of calcarine sulcus. A similar segregation is expected at the level of  
249 the lateral geniculate nucleus (LGN), although no systematic activation was observed in this  
250 subcortical region. Due to the unavailability of CHP for further scanning, no data are available  
251 contrasting left and right hemifield representations to test for hemifield dominance domains as  
252 described before in complete achiasma (Olman et al., 2016).

A) Left eye vs right eye

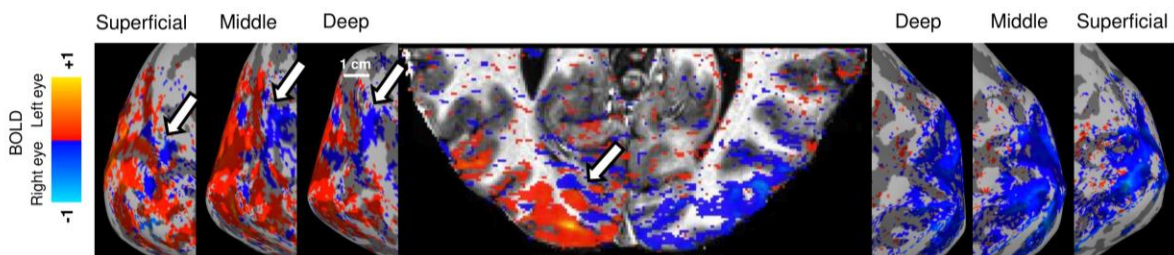

B)

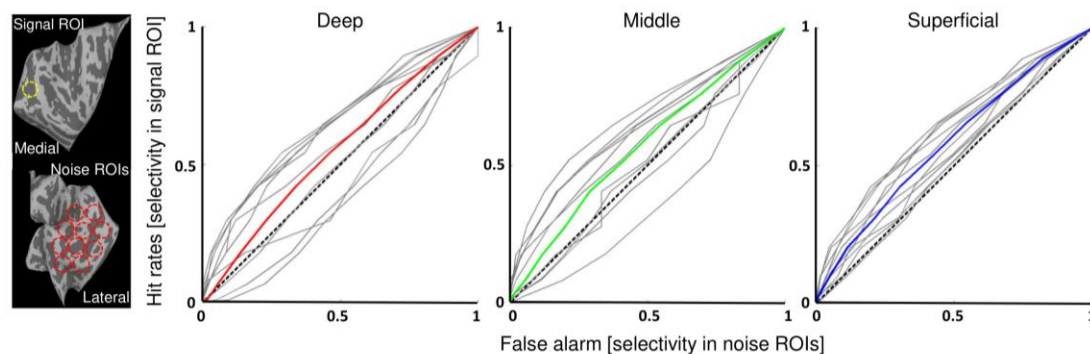

253

254 **Figure 6. Response to left vs right eye stimulation.** A) The cortical activation (signal amplitude  
255 expressed as  $\beta$  coefficient from the general linear model thresholded by cluster size and mean  
256 Student's T statistic (cluster = 20, threshold by  $T = 1.98$ ,  $p = 0.05$ , uncorrected) is projected onto  
257 a clipped anatomical image of the occipital cortex and onto the inflated cortical surfaces of the  
258 deep, middle, and superficial layers. Right eye preference observed in the anterior region of the  
259 left calcarine sulcus is indicated by white arrows. B) Comparison of  $I_{\text{selectivity}}$  between signal and  
260 noise ROIs across lamina via ROC analysis. The approximate position of these ROIs is displayed  
261 in the left panel. Hit rates depict the selectivity in the signal ROI, and false alarms outline the  
262 selectivity in the ten noise ROIs. The dashed line represents bisection, where the selectivity  
263 indices of the signal and noise ROIs cannot be distinguished. The average selectivity indices for  
264 all three cortical layers are above the reference line, indicating segregation of two neuronal  
265 populations with differential responses to the left or the right eye.

266

267

268

## 269 **Discussion**

270 In the case of chiasma hypoplasia examined here, input from three visual hemifields converges  
271 onto the same cortical area. This puts a critical challenge on the organization of the visual cortex,  
272 which normally comprises a retinotopically aligned overlay of only two maps, i.e. input from  
273 each eye representing the contralateral visual hemifield. The current study, therefore, provides  
274 novel insight into the scope and mechanisms of human visual system development and plasticity.  
275 Using submillimeter fMRI at 7T, DWI and fMRI-based pRF mapping at 3T, we report  
276 asymmetrical crossing of the nasal fibers of the two eyes that results in three overlaid  
277 representations of opposing hemifields on the left visual cortex with segregation of two neuronal  
278 populations in the vicinity of the calcarine sulcus with different ocular preference. These findings  
279 demonstrate that the scope of cortical plasticity in the human visual system is sufficient to  
280 accommodate input from three visual hemifields.

281 The retinotopically registered overlay of the representation of visual hemifields is a key property  
282 of the primary visual cortex. Remarkably, this is not only observed in the neuro-typical visual  
283 system, where these two maps comprise the binocular input of the contralateral visual hemifield it  
284 also holds for conditions with abnormal predominantly monocular input, as achiasma, albinism,  
285 or FHONDA (Ahmadi et al., 2018; Hoffmann et al., 2012, 2003). While the two maps segregate  
286 into ocular dominance domains in the neuro-typical case, they segregate into hemifield domains  
287 (Guillery et al., 1984; Olman et al., 2016) for conditions with congenital chiasma malformations.  
288 This is taken as evidence for largely unaltered geniculo-striate connections despite congenitally  
289 abnormal input to the LGN (Hoffmann and Dumoulin, 2015), as summarized in Figure 7 A and  
290 B. In fact, it appears that the neuro-typical geniculo-striate projection is in general largely  
291 unaffected by enhanced or absent crossing at the optic chiasm as in albinism/FHONDA or  
292 achiasma, respectively (Ahmadi et al., 2018; Hoffmann and Dumoulin, 2015). Consequently, we  
293 asked which cortical organization pattern would result from such stability in the geniculo-cortical  
294 projections in the present case of chiasma hypoplasia, in whom the left V1 receives triple  
295 hemifield input. Such an input is expected to result in a combination of the normal organization,  
296 i.e. ocular dominance domains (Figure 7A), and the organization found in complete achiasma, i.e.  
297 hemifield domains (Figure 7B) as depicted in Figure 7C: the abnormal ipsilateral input from the  
298 left nasal hemiretina and the residual normal input from the right nasal hemiretina are expected to  
299 converge into the same domain (Figure 7C). In the absence of geniculo-striate rewiring, the  
300 resulting cortical organization pattern is a retinotopic representation of the contralateral visual

301 hemifield, via the left eye, that is interleaved with combined retinotopic representations of the  
302 ipsilateral and contralateral hemifield, via the left and right eye respectively. We, therefore,  
303 termed it in analogy to the nomenclature introduced previously (Hoffmann and Dumoulin, 2015),  
304 ‘Interleaved Combined Representation’. In fact, such a pattern would result in the macroscopic  
305 cortical mapping we observed in the left occipital lobe. Moreover, it would predict, at the  
306 mesoscopic scale, regions that are more strongly activated by one eye than the other, and vice  
307 versa. This is in accordance with our submillimeter fMRI findings of two interdigitated neuronal  
308 populations with different eye preference on the left hemisphere. It should be noted though that  
309 the domain receiving input from the right visual hemifield, receives input from both eyes, thus  
310 reducing the differential activation via the two eyes. Further, we can, at present, not tell whether  
311 the neuronal populations representing the right hemifield input from both eyes segregate into  
312 distinct neuronal populations, due to the unavailability of data with sufficient resolution. Taken  
313 together, stable geniculo-striate projections still hold true even in the presence of triple input as  
314 observed in CHP. This conservative projection scheme, therefore, appears to be the most  
315 parsimonious concept to explain the cortical maps observed in a set of congenital projection  
316 abnormalities of the optic nerves, i.e. for enhanced, reduced or absent crossing.

317 Remarkably, the triple hemifield input to the left hemisphere affects only, albeit extensively, part  
318 of the primary visual cortex. In fact, another part of the visual cortex receives largely exclusive  
319 input from both hemiretinae of the left eye, as typical for complete achiasma. As a consequence,  
320 there is a coexistence of the ‘Interleaved Representation’ (Figure 7B) and ‘Interleaved Combined  
321 Representation’ (Figure 7C), occupying different regions of the left primary visual cortex. This is  
322 in accordance with the reports of animal models of albinism indicating a mixed organization  
323 patterns in the primary visual cortex (Cooper and Blasdel, 1980). Taken together, this suggests  
324 that the relevant adaptive developmental mechanisms can act locally.

325 Consistent with the reports on complete achiasma (Davies-Thompson et al., 2013; Hoffmann et  
326 al., 2012; Olman et al., 2016; Victor et al., 2000), the participant of the present study did not have  
327 visual field defects and made effective use of vision in daily life, including sport activities and  
328 reading. This indicates that in the current case of chiasma hypoplasia general aspects of visual  
329 function are preserved, apart from reduced binocular/stereo-vision, strabismus, and nystagmus.  
330 Despite the binocular input to the left visual cortex, the disruption of binocular and stereo-vision  
331 is expected in CHP due to vertical and horizontal deviations between the two eyes. This indicates  
332 that there is no relevant interaction of the three representations in the left visual cortex. In fact,



333 although the independence of perception in opposite hemifields was not quantitatively tested  
 334 here, the every-day behavior of CHP does not show any confusion between the left and right  
 335 hemifields. As a consequence, it is, in analogy to findings in other conditions with chiasma  
 336 abnormalities (Klemen et al., 2012; Olman et al., 2016; Victor et al., 2000), suggested that the  
 337 three representations of the hemifields in the left primary visual cortex independently drive visual  
 338 perception. Further research addressing the independence of the three different maps is motivated  
 339 by the current findings. Based on our current knowledge, no integration of information across the  
 340 ocular dominance and/or across the hemifield dominance domains is expected to occur in CHP.  
 341 Thus, the plasticity of the intracortical micro-circuitry appears instrumental to cope with the  
 342 abnormal visual input and to support independent processing of the three superimposed  
 343 hemifields (Figure 7).

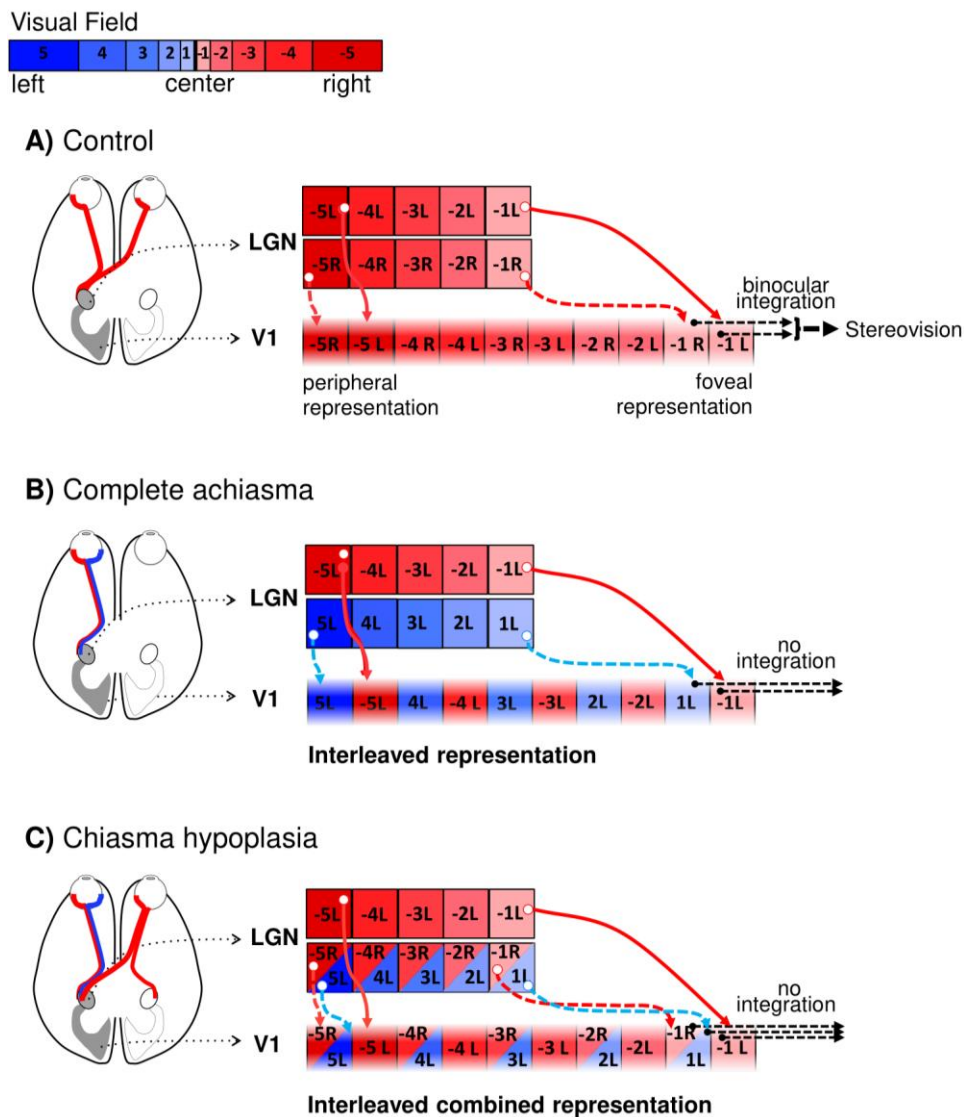

345 **Figure 7. Schematic of visual field representations in primary visual cortex for control,**  
346 **complete achiasma and chiasma hypoplasia. A)** Control. The binocular input to the left LGN is  
347 organized as retinotopic maps of the right visual field (color coded red; negative numbers) that  
348 are separate for each eye (subscript indicates L – left, R – right eye input; the LGN is  
349 schematized as only two LGN layers with input from either eye). The geniculo-striate projections  
350 (solid red arrows for the left and dashed red arrows for the right eye input) result in interleaved  
351 retinotopic representations of the two eyes in V1. The integration of binocular input from  
352 corresponding locations in the contralateral visual field leads to binocular and stereo-vision. **B)**  
353 Complete achiasma. The left LGN receives monocular input from the nasal (blue) and from the  
354 temporal (red) hemiretina of the ipsilateral eye (i.e. left the eye, indicated by the subscript L).  
355 Consequently, there is in addition to the normal input from the contralateral visual field (red  
356 fields with negative numbers) input from the ipsilateral visual field (blue fields with positive  
357 numbers). This leads to an interleaved representation of opposing hemifields in V1, which is  
358 associated with a conservative, i.e. unchanged, geniculo-striate projection despite the abnormal  
359 LGN input (dashed cyan arrows). The absence of integration of the monocular input from  
360 opposing visual hemifields counteracts cross-talk of information between the hemifield. **C)**  
361 Chiasma hypoplasia. The left LGN receives binocular input from the contralateral visual field  
362 (red fields with negative numbers) as well as ipsilateral input (blue fields with positive numbers)  
363 only from the left eye. The triple hemifield input to the left LGN is organized as an interleaved  
364 representation of the contralateral visual field from the left eye (red fields with negative numbers  
365 in separate boxes) and combined representation of opposing hemifields from both eyes (red fields  
366 with negative numbers and blue fields with positive numbers in shared boxes). A conservative  
367 geniculo-striate projection to V1 would result in an interleaved combined representation pattern,  
368 obtained by the combination of cortical organization schemes for the control (A) and complete  
369 achiasma (B). Specifically, while the contralateral input of the left eye is incorporated via a  
370 separate domain, the contralateral input of the right eye together with the ipsilateral input of the  
371 left eye are assumed to be accommodated within a shared domain. Similar to complete achiasma,  
372 no integration is expected to occur across the three hemifield representations, supporting  
373 independent processing of the three maps.

374  
375 Akin to other visual pathway abnormalities, it is therefore assumed that the aberrant  
376 representation in CHP is made available for relatively normal visual perception through the  
377 interplay of subcortical stability and cortical plasticity. The cortical plasticity might not be  
378 confined to changes in the intra-cortical connectivity and, in addition, affect the cortico-cortical  
379 connectivity as suggested by changes in pRF and connective field (CF) size estimates (Figure  
380 S3). It, therefore, appears that the extra-input from the right eye impacts on the cortico-cortical  
381 connectivity of the early visual areas in CHP.

382 Studying visual system abnormalities is a unique approach for advancing our insights into the  
383 interplay of pathology and plasticity directly in humans and for gaining an understanding of the

384 underlying developmental principles. A common limitation, however, is the rarity of relevant  
385 conditions and hence the limited availability of affected individuals. This also applies to the field  
386 of congenital malformations of the optic chiasm. While the well-known enhanced crossing of the  
387 optic nerves in albinism is already a rare condition [1.17:000; (Grønsvov et al., 2007)], reduced  
388 crossing, i.e. achiasma, is much rarer [ $<50$  cases published worldwide, (Hoffmann and Dumoulin,  
389 2015)]. In fact, fMRI-data have been reported in the past two decades for only 6 different  
390 individuals (Bao et al., 2015; Davies-Thompson et al., 2013; Hoffmann et al., 2012; Nguyen et  
391 al., 2018; Victor et al., 2000). Thus, investigating a subtype of achiasma, i.e. with the specific  
392 hypoplasia of the optic chiasm reported in the present study, is an exceptional case. As a  
393 consequence, we did not have the opportunity to obtain additional data for this condition, neither  
394 from the present nor from other individuals, despite the potentially informative value of e.g.  
395 additional submillimeter fMRI data. Another limitation of investigating visual system pathologies  
396 is related to fixation instabilities. These might alter the effective visual stimulation and thus  
397 impact on the obtained cortical activation patterns. For the individual of the present study,  
398 nystagmus was observed to be moderate, although no quantitative data are available. It should be  
399 noted, however, that while the present case is unique, it shares features, previously reported for  
400 achiasma, i.e. the retinotopic overlay of opposing visual hemifields (Hoffmann and Dumoulin,  
401 2015). This is taken as an indication of the overall quality of the functional data obtained.  
402 Specifically, the data-set allowed reproducing previous results, i.e. orderly eccentricity and polar-  
403 angle maps from opposing visual hemifields via the ipsilateral (left) eye, and adding a further  
404 feature, i.e. the third input to the left visual cortex via the contralateral (right) eye. Stimulus-  
405 induced deviations from central fixation would be expected to be specific to the visual stimuli  
406 applied. Importantly, the activation in the cortical region comprising the additional third input  
407 was reproducible for different stimulation conditions applied via the right eye, i.e., for bilateral  
408 stimulation (Figure 1B) and for right hemifield mapping (Figure 3D). We conclude that fixation  
409 instabilities are a highly unlikely source of the observed cortical triple maps. Finally, it might be  
410 argued that the comparison of the observed findings in CHP with strabismic amblyopes with a  
411 similar level of acuity would be more informative than the healthy controls. However, no  
412 alteration/shrinkage of the ocular dominance domains has been reported in a previous  
413 postmortem study of an individual with strabismic amblyopia (Horton and Hocking, 1996).  
414 Furthermore, the retinotopic organization of the visual cortex in these patients does not  
415 drastically differ from the controls except for enlarged pRF sizes for the amblyopic eye

416 (Clavagnier et al., 2015). It is, therefore, concluded that the interpretation of the observed striking  
417 cortical organization in CHP does not depend on the reference group.

#### 418 *Conclusion*

419 Congenital visual pathway abnormalities are powerful models to further our understanding of the  
420 scope of developmental stability and plasticity in the human visual system, which may impact on  
421 novel therapeutic approaches. Here, we demonstrate that the gross topography of the geniculo-  
422 striate projections in CHP remains chiefly unaltered resulting in triple hemifield input to the  
423 visual cortex. This reflects an unaltered geniculo-cortical axonal guidance by chemoaffinity  
424 gradients (Cang et al., 2005; McLaughlin and O’Leary, 2005), even in the face of severely  
425 erroneous input to LGN. The additional input to the left visual cortex is assumed to be  
426 incorporated by sharing the same domain between the abnormal input of the left eye and normal  
427 input of the right eye. This underlines that intra-cortical plasticity provides sufficient scope to  
428 accommodate highly atypical visual input for comparatively normal visual processing.

#### 429 **Materials and Methods**

##### 430 *Participants*

431 The measurements were performed at two sites. CHP was first scanned at Magdeburg University,  
432 Germany, at the age of 24. In two consecutive days, she underwent submillimeter fMRI at 7T and  
433 DWI scanning sessions at 3T. Due to limited availability of CHP, pRF mapping data were  
434 acquired two years later at York Neuroimaging Center, UK, at 3T. In addition to CHP, 12  
435 respective control participants were also included in the current study. The first four controls (C1  
436 – C4) took part in a pRF mapping session at 3T while the other seven controls (C5 – C11)  
437 participated in the DWI sessions. The last control participant (C12) underwent both  
438 submillimeter fMRI and DWI at 7 and 3T. All the experiments on controls were conducted in  
439 Magdeburg. Informed written consent was obtained from all participants prior to the study  
440 investigations. The procedures followed the tenets of the declaration of Helsinki and the  
441 respective protocols were approved by the ethical committees of the University of Magdeburg  
442 and York Neuroimaging Centre.

##### 443 *Submillimeter fMRI*

444 **Visual stimulation:** Visual stimuli were presented by back-projection onto a screen with a  
445 resolution of 1920 X 1080 pixels and viewed at a distance of 100 cm via an angled mirror.

446 Presentation software package (Neurobehavioral Systems, Berkeley, CA, USA) was used to  
447 control stimulus presentation. The stimuli extended  $\pm 12.9^\circ$  by  $\pm 7.4^\circ$  of visual angle from the  
448 center of the screen and comprised bilateral, contrast reversing (8 reversals per second) black and  
449 white checkerboards with 24 segments and 26 rings (mean luminance  $62 \text{ cd/m}^2$ , contrast 99%). A  
450 block design, alternating between the two eyes was selected. It consisted of 14 checkerboard  
451 presentation blocks (7 blocks per eye), each of which lasted for 12 s and was followed by a rest  
452 block (mean luminance gray background) with the same duration. The presentation blocks were  
453 preceded by an additional rest block of 12 s for dummy stimulation. Participants wore a custom-  
454 made manually operated shutter that allowed monocular viewing through either the left or right  
455 eye. They fixated a central fixation cross, which changed its color one second after initiation of  
456 each rest block, lasting for 23 s (11 s of the rest block plus 12 s of the next presentation block).  
457 The participants were requested to occlude the right eye and view the stimuli with the left eye for  
458 a green fixation cross, and vice versa for a red one. An MRI-compatible camera was used to view  
459 the dominant eye, to ensure that the participants were doing the task correctly.

460 **MRI acquisition:** For functional imaging, T2\*-weighted images were acquired using a 2D  
461 gradient-echo EPI sequence with a 7 Tesla whole body MRI scanner (Siemens Healthineers,  
462 Erlangen, Germany) using a 32 channel head coil (Nova Medical, Wilmington, MA). The  
463 acquisition parameters were as following: TR | TE = 3000 | 22 ms, flip angle =  $90^\circ$ , FOV = 169  
464 (right-left)  $\times$  130 (anterior-posterior)  $\times$  27 (feet-head)  $\text{mm}^3$ , acceleration factor (r) = 4 with  
465 GRAPPA reconstruction, phase-encoding direction = right-left, phase partial Fourier =  $\frac{5}{8}$ ,  
466 bandwidth (BW) = 1086 Hz/px, echo-spacing = 1.13 ms and voxel size =  $0.65 \times 0.65 \times 0.65 \text{ mm}^3$ .  
467 Forty-one oblique axial slices were acquired parallel to the calcarine sulcus for the duration of  
468 348 s with 116 time frames, of which the first four were discarded. Foam padding was used to  
469 minimize head motion. Four runs of bilateral stimulation were performed for each participant in a  
470 single session.

471 High-resolution anatomical volume was obtained using a 3D T1-weighted MPRAGE sequence  
472 (TR | TE | TI = 2500 | 2.76 | 1050 ms, total duration = 14:14 min, flip angle =  $5^\circ$ , FOV:  
473  $350 \times 263 \times 350 \text{ mm}^3$ , and voxel size =  $0.65 \times 0.65 \times 0.65 \text{ mm}^3$ ). In addition, a proton density  
474 weighted volume without the inversion module (identical parameters except for TR = 1820 ms  
475 and total duration = 5:33 min) was acquired to correct for receive coil biases (Van de Moortele et  
476 al., 2009).



477 **Data analysis:** To obtain an inhomogeneity corrected anatomical volume, the T1-weighted  
478 MPRAGE reference volume was divided by the proton density weighted volume. Gray and white  
479 matter (GM/WM) were segmented based on the resulting anatomical volume in MIPAV  
480 (<https://mipav.cit.nih.gov/>) using the TOADS/CRUISE algorithm (Bazin and Pham, 2007; Han et  
481 al., 2004). Manual editing was performed in ITK-GRAY  
482 (<https://web.stanford.edu/group/vista/cgi-bin/wiki/index.php/ItkGray>) to minimize the  
483 segmentation error. An equi-volume distance map was employed (Waehnert et al., 2014) to build  
484 a coordinate system along the cortical depth, taking the local curvature into account.

485 The functional data were corrected for motion artifacts and spatial distortion using MCFLIRT  
486 function of FSL (<https://www.fmrib.ox.ac.uk/fsl>) and a point spread function (PSF) mapping  
487 method (In and Speck, 2012) respectively. Motion and distortion corrected data were then  
488 analyzed using AFNI (<https://afni.nimh.nih.gov/afni>). Time series were averaged across  
489 repetitions for each participant to increase the signal-to-noise ratio (SNR). Afterwards, the  
490 averaged functional volume was aligned to the T1-weighted anatomical volume using an affine  
491 transformation. The alignment was performed in three steps: First, the T1-weighted anatomy and  
492 the averaged EPI were clipped in the anterior-posterior direction, leaving only the occipito-  
493 temporal cortex. A good starting point was provided by centering the functional volume on the  
494 anatomy using the respective centers of mass. Next, the averaged functional volume was affinely  
495 aligned to the T1-weighted volume via AFNI's 'align\_epi\_anat.py' with the local Pearson's  
496 coefficient (LPC) cost function (Saad et al., 2009), using the two-pass option. This procedure  
497 blurs the functional volume and initially allows for large rotation and shift, and then refines the  
498 alignment by an affine transformation. Finally, the resulting alignment was further improved via  
499 3dAllineate, using the one-pass option. In this step, the functional volume is not blurred. Only a  
500 small amount of shift and rotation is allowed, using an affine transformation that is obtained by  
501 concatenating the transformation matrices generated in previous steps (Fracasso et al., 2018;  
502 Klein et al., 2018).

503 A general linear model was used to analyze the functional data. For each voxel, the percentage of  
504 BOLD signal changes to stimulation of the left and right eye was estimated via 3dDeconvolve  
505 function of AFNI. Nuisance regressors were modeled using polynomials up to the second order  
506 to remove any linear and quadratic trends. The GLM analysis was performed on the native EPI  
507 space. The obtained GLM maps (T-maps and beta-coefficient-maps;  $T = 1.98$ ,  $p = 0.05$ ,  
508 uncorrected) were interpolated to the T1-weighted space via nearest-neighbor interpolation, using

509 the affine transformation matrix estimated in the alignment step. For each of the cortical layers, a  
510 3D mesh was generated using AFNI's IsoSurface function. To assess the presence of ocular  
511 dominance domains structures in the data throughout the cortical depth, eleven ROIs were  
512 selected on the cortical surface of the deep, middle and superficial layers and were mapped back  
513 onto the volume dataset via 3dSurf2Vol function for further analysis. The first ROI ( $ROI_{\text{signal}}$ )  
514 was drawn in the banks of the calcarine sulcus where the ocular dominance domains should be  
515 located. The remaining ten ROIs ( $ROI_{\text{noise}}$ ) were drawn in different regions of the occipito-  
516 temporal cortex where there should be no ocular dominance domains (see Figure 6B, left panel).  
517 The selectivity index was then derived (Kemper et al., 2018; Olman et al., 2016) from the voxels  
518 within these ROIs. It was defined as a measure for eye preference, i.e. the difference between the  
519 responses to left ('L') and right ('R') eye stimulation divided by sum of the responses to visual  
520 stimuli:  $I_{\text{selectivity}} = |(L - R) / (L + R)|$ . The segregation of the binocular input was quantitatively  
521 evaluated by voxelwise comparison of the selectivity between  $ROI_{\text{signal}}$ , and each  $ROI_{\text{noise}}$ , using  
522 receiver operating characteristic (ROC) analysis. Furthermore, the selectivity of  $ROI_{\text{signal}}$  was  
523 compared to the average selectivity of the ten  $ROI_{\text{noise}}$  with identical analysis.

#### 524 *Diffusion-weighted imaging*

525 **MRI acquisition:** DWI data were acquired using a 3 Tesla MAGNETOM Prisma syngo MR  
526 D13D scanner (Siemens Healthineers, Erlangen, Germany) with a 64 channel head coil. MRI  
527 acquisition was initiated by a localizer scan, followed by a T1-weighted and two diffusion-  
528 weighted scans. All data were collected during a single scanning session. The T1-weighted  
529 volume was obtained in sagittal orientation using a 3D-MPRAGE sequence (TE | TR = 4.46 |  
530 2600 ms, TI = 1100 ms, flip angle = 7°, resolution = 0.9 x 0.9 x 0.9 mm<sup>3</sup>, FoV = 230 × 230 mm<sup>2</sup>,  
531 image matrix = 256 × 256 x 176, acquisition time (TA) = 11:06 min). The first diffusion-  
532 weighted scan was acquired with Echo-Planar Imaging (EPI) with the following parameters: b-  
533 value = 1600 s/mm<sup>2</sup>, TR | TE = 9400 | 64.0 ms, voxel size = 1.5 x 1.5 x 1.5 mm<sup>3</sup>, phase-encoding  
534 direction = anterior to posterior, FoV = 220 x 220 mm<sup>2</sup>, and TA = 22:24 min. Scanning was  
535 performed with 128 unique gradient directions, thus the obtained diffusion-weighted data can be  
536 described as High Angular Resolution Diffusion Imaging (HARDI) data (Tuch et al., 2002).  
537 Gradient tables were generated using E. Caruyer's tool ([http://www.emmanuelcaruyer.com/q-  
538 space-sampling.php](http://www.emmanuelcaruyer.com/q-space-sampling.php)) for q-space sampling (Caruyer et al., 2013). Diffusion-weighted volumes  
539 were evenly intersected by 10 non-diffusion weighted volumes for the purpose of motion  
540 correction. The second diffusion-weighted scan was acquired with identical parameters except for

541 reversed phase-encoding direction in comparison to the preceding scan, i.e., posterior to anterior  
542 direction. Acquisition of two diffusion-weighted scans with opposite phase-encoding directions  
543 enhances the correction of susceptibility-induced geometric distortion (Andersson et al., 2003)  
544 and improves the SNR of the total DWI data.

545 **Data analysis:** Conversion of DICOM images to NIFTI format, denoising of the DWI data and  
546 removal of Gibbs ringing were performed with MRtrix 3.0 (<http://www.mrtrix.org/>). FSL was  
547 employed for the correction of susceptibility-induced geometric distortions, eddy current  
548 distortions, and motion artifacts. The bias field in the DWI data was corrected using ANTS  
549 (<http://stnava.github.io/ANTs/>). Afterwards, DWI data were co-registered to the T1-weighted  
550 volume, which was aligned beforehand to Anterior Commissure – Posterior Commissure line, via  
551 mrDiffusion (<https://github.com/vistalab/vistasoft/tree/master/mrDiffusion>). The T1-weighted  
552 volume was automatically segmented using FIRST function of FSL. Subsequently, manual  
553 editing was performed to mitigate segmentation errors in the region of the optic chiasm.

554 Each voxel of the preprocessed DWI data was modelled using the Constrained Spherical  
555 Deconvolution (CSD) approach (Tournier et al., 2008), which is particularly sensitive when  
556 resolving populations of crossing fibers, like those observed in the optic chiasm, and benefits  
557 from the high angular resolution of HARDI data. The application of the CSD model involved the  
558 estimation of single fiber response function with Tournier’s algorithm (Tournier et al., 2013) for  
559 maximum harmonic order ( $L_{max} = 6$ ) and the estimation of fiber orientation distribution  
560 functions (Jeurissen et al., 2014) for 3 different maximum harmonic orders i.e.  $L_{max} = 6, 8$  and  
561 10. Four ROIs were manually drawn on the T1-weighted volume, two covering cross-sections of  
562 the two optic nerves, and the other two covering cross-sections of the two optic tracts. The ROIs  
563 were placed as close to the optic chiasm as possible, but did not intersect it. Each ROI had a  
564 width of 3 voxels (anterior-posterior) to assure proper streamline termination during  
565 tractography. Fiber tracking was performed between the ROIs of the two optic nerves as seeds  
566 and the ROIs of the two optic tracts as targets, resulting in 4 connectivity pairs (2 ipsilateral and 2  
567 contralateral fiber bundles). Tracking was done in two directions i.e. from seed to target ROI and  
568 backwards to ensure the indifference of the results to direction of tracking. The corresponding  
569 generated connectivity pairs were subsequently merged together. The tracking employed an  
570 ensemble tractography (ET) framework (Takemura et al., 2016), where tracking is performed  
571 several times, each time for a different set of parameters. As such, the bias in the outcome tracts,  
572 caused by parameter selection, is avoided. The tracking was performed with the probabilistic

573 tracking algorithm iFOD2 (Tournier et al., 2010) using unique combinations of 2 different  
574 fractional anisotropy (FA) thresholds (FA = 0.04 and 0.08), 3 maximum curvature angles (30°,  
575 45°, 60°), and 3 CSD models estimated for different maximum harmonic orders ( $L_{\max} = 6, 8, 10$ )  
576 for each of 139000 seeding attempts. Additionally, tractography employed an anatomically-  
577 constrained tractography (ACT) approach (Smith et al., 2012), which constrains tractography  
578 with anatomical priors derived from the anatomical image using white/gray matter, subcortical  
579 gray matter and CSF masks obtained with FSL's FIRST function. As a result of the tractography,  
580 4 streamline groups corresponding to 4 distinct connectivity pairs were obtained. The proportion  
581 of streamlines in each group was subsequently used as an estimate of the connectivity strength in  
582 the optic chiasm.

583 *Population receptive field (pRF) and connective field (CF) modeling*

584 **Visual stimulation:** Visual stimuli consisted of drifting bar apertures (stimulus size in York and  
585 Magdeburg: 11° and 10° radius, respectively), exposing a moving high-contrast checkerboard  
586 pattern (Dumoulin and Wandell, 2008) at four different directions i.e. upward, downward, left  
587 and right. The bars were presented to each eye separately within a mask, covering either the left  
588 or the right hemifields for stimulation of either the nasal or the temporal retina in separate  
589 experiments. The width of the bars subtended one-quarter of the stimulus radius. Each pass of the  
590 bars lasted for 30 s, followed by a mean luminance block (zero contrast) of 30 s. The stimuli were  
591 generated in MATLAB (Mathworks, Natick, MA, USA) using the Psychtoolbox (Brainard, 1997;  
592 Pelli, 1997) and rear-projected onto a screen (screen resolution in York and Magdeburg: 1920 x  
593 1080 and 1140 x 780 pixels, respectively) inside the magnet bore. In York, the participant (CHP)  
594 viewed the screen at a distance of 57 cm via an angled, front-silvered mirror whereas the eye to  
595 screen distance in Magdeburg was 35 cm. Participants were required to fixate a centered dot and  
596 to report color changes between red and green by means of a button press.

597 **MRI acquisition:** Identical 3 Tesla Prisma scanners (Siemens Healthineers, Erlangen, Germany)  
598 were used at both sites. At York Neuroimaging Center, functional T2\*-weighted images were  
599 acquired with a 64 channel head coil. A total of 30 EPI slices were obtained within a FOV of 192  
600 mm, with 3 x 3 x 3 mm<sup>3</sup> voxels (TR | TE = 1500 | 26 ms and flip angle = 80°). Each functional  
601 scan comprised 168 time frames, lasting for 252 s. The first eight time-frames (12 s) were  
602 removed to allow magnetization to reach a steady-state. Foam padding was used to minimize  
603 head motion. Additionally, a T1-weighted anatomical volume was acquired at a resolution of 1 x  
604 1 x 1 mm<sup>3</sup> (TR | TE = 2500 | 42.26 ms and flip angle = 7°). Eight functional scans were obtained

605 in a single session (4 scans per eye). The right eye was stimulated during the first 4 runs while the  
606 left eye was patched. The stimulation of each of the left and right hemifields was repeated twice  
607 in a counterbalanced manner. After a short break in the scanning, the left eye was stimulated  
608 while the right eye was occluded. The same stimulation procedure was performed for the left eye.  
609 At Magdeburg University, functional images (TR | TE = 1500 | 30 ms and flip angle = 70°) were  
610 acquired at a resolution of 2.5 x 2.5 x 2.5 mm<sup>3</sup> with 54 axial slices, using a 64 channel head coil.  
611 Every functional scan had 168 time frames (252 s). In addition, a high resolution whole-brain  
612 anatomical volume (voxel size = 0.9 x 0.9 x 0.9 mm<sup>3</sup>, TR | TE = 2600 | 4.46 ms, and flip angle =  
613 7°) was obtained. Foam padding limited the head movements. In each session, left and right  
614 hemifield stimulation conditions were performed monocularly and repeated six times (three  
615 repetitions per hemifield).

616 **Data analysis:** The same analysis pipeline was used for data sets acquired in both sites. The T1-  
617 weighted anatomical volume was automatically segmented using the recon-all function of  
618 FreeSurfer (<https://surfer.nmr.mgh.harvard.edu>). The cortical surface was reconstructed at the  
619 white/gray matter boundary and rendered as a smoothed 3D mesh (Wandell et al., 2000). The  
620 MCFLIRT function of FSL was used for motion correction of the functional data. Motion  
621 corrected data were then analyzed using freely available Vistasoft software package for  
622 MATLAB (<https://github.com/vistalab/vistasoft>). Time series for the same conditions were  
623 averaged together for each participant to increase the SNR. Afterwards, the averaged functional  
624 image was co-registered to the anatomical scan using a combination of Vistasoft and Kendrick  
625 Kay's alignment tools (<https://github.com/kendrickkay/alignvolumedata>). Visual areas were  
626 mapped using the population receptive field (pRF) modeling (Dumoulin and Wandell, 2008).  
627 Briefly, the BOLD (blood oxygen level dependent) response of each voxel was predicted using a  
628 2D-Gaussian model of the neuronal populations defined by three stimulus-referred parameters i.e.  
629  $x_0$ ,  $y_0$ ,  $\sigma$  where  $x_0$  and  $y_0$  are the coordinates of the receptive field center and  $\sigma$  is its spread  
630 (Dumoulin and Wandell, 2008; Fracasso et al., 2016; Harvey and Dumoulin, 2011). The  
631 predicted BOLD signal was then calculated by convolution of the stimulus sequence for the  
632 respective pRF-model and its three parameters with the canonical hemodynamic response  
633 function (Friston et al., 1998). The optimal pRF parameters were found by minimizing the sum of  
634 squared errors (RSS) between the predicted and observed BOLD time-course. For all subsequent  
635 analyses including derivation of the polar angle and eccentricity maps, required for the



636 delineation of the visual areas, and the visualization on the inflated cortical surface, only the  
637 voxels were included whose pRF fits exceeded 15% of the variance explained.

638 The connective field parameters were estimated from the fMRI time-series, using CF modeling  
639 method that predicts the neuronal activity in one brain area with reference to aggregate activity in  
640 another area (Haak et al., 2013). The BOLD response in each voxel of a target ROI i.e. V2 or V3,  
641 was predicted with a symmetrical, circular 2D Gaussian CF model folded to follow the cortical  
642 surface of the source ROI, i.e. V1. The CF model was defined by two parameters i.e. Gaussian  
643 position and spread across the cortical surface. The optimal CF parameters were determined by  
644 minimizing the residual sum of squares between the predicted, and the observed time-series. For  
645 this purpose, many fMRI time-series predictions were generated by changing the CF positions  
646 across all voxel positions and Gaussian spread values on the surface of the source ROI. Best  
647 models were selected when the explained variance in the fMRI time-series survived a threshold  
648 of 15%.

#### 649 **Visual field testing**

650 We simulated the Humphrey visual field testing using PsychoPy (<https://www.psychopy.org>) on  
651 a calibrated CRT monitor (22-inch Mitsubishi 2070SB at 85 Hz). Background luminance was set  
652 to  $10 \text{ cd/m}^2$ , equal to 30 dB. Goldmann size III stimuli i.e., white circular patches ( $0.43^\circ$   
653 diameter) were displayed for 235 ms and placed at 54 locations according to the Humphrey 24-2  
654 standard test. In addition, four stimuli were placed at 12, 15, 18, and 21 degrees into the temporal  
655 field along the horizontal meridian in order to capture the blind spot. The detection threshold was  
656 tested in both eyes with one-up-one down staircase procedure with a minimum of 30 trials per  
657 location. Responses were within 800 ms after stimulus presentation. An initial adaptive staircase  
658 with 4dB / 2dB step sizes was used to coarsely estimate the threshold at 16 locations in the visual  
659 field (4 in each visual quadrant), starting at the maximum gun value. Subsequently, a second  
660 adaptive staircase with finer step sizes (minimum 0.25 dB) was used to more accurately find the  
661 threshold starting at a gun value of 25% of the maximum ( $35 \text{ cd/m}^2$ ).

#### 662 **Acknowledgements**

663 The authors thank CHP and the controls for their patience and cooperation. This work was  
664 supported by European Union's Horizon 2020 research and innovation programme under the  
665 Marie Skłodowska-Curie grant agreement (No. 641805) to S.O.D, A.B.M and M.B.H.

666

667 **Author Contributions**

668 Conceptualization, K.A., A.F., A.D.G., S.O.D., A.B.M., M.B.H.; Methodology, K.A., A.F., R.J.P.  
669 A.D.G., R.Y., O.S., J.K., F.P., M.B.H.; Formal Analysis, K.A., A.F., and R.J.P.; Investigation,  
670 K.A., A.D.G., A.B.M., and M.B.H; Writing – Original Draft, K.A. and R.J.P; Writing – Review  
671 and Editing, K.A., A.F., O.S., F.P., S.O.D., A.B.M., and M.B.H.

672 **Competing interests**

673 The authors declare no competing interests.

674 **References**

- 675 Ahmadi, K., Fracasso, A., van Dijk, J.A., Kruijt, C., van Genderen, M., Dumoulin, S.O., Hoffmann, M.B.,  
676 2018. Altered organization of the visual cortex in FHONDA syndrome. *NeuroImage*.
- 677 Andersson, J.L., Skare, S., Ashburner, J., 2003. How to correct susceptibility distortions in spin-echo  
678 echo-planar images: application to diffusion tensor imaging. *Neuroimage* 20, 870–888.
- 679 Apkarian, P., Bour, L., Barth, P.G., 1994. A unique achiasmatic anomaly detected in non-albinos with  
680 misrouted retinal-fugal projections. *Eur. J. Neurosci.* 6, 501–507.
- 681 Apkarian, P., Reits, D., Spekreijse, H., Van Dorp, D., 1983. A decisive electrophysiological test for  
682 human albinism. *Electroencephalogr. Clin. Neurophysiol.* 55, 513–531.
- 683 Bao, P., Purington, C.J., Tjan, B.S., 2015. Using an achiasmatic human visual system to quantify the  
684 relationship between the fMRI BOLD signal and neural response. *eLife* 4, e09600.  
685 <https://doi.org/10.7554/eLife.09600>
- 686 Bazin, P.-L., Pham, D.L., 2007. Topology-preserving tissue classification of magnetic resonance brain  
687 images. *IEEE Trans. Med. Imaging* 26, 487–496.
- 688 Brainard, D.H., 1997. The Psychophysics Toolbox. *Spat. Vis.* 10, 433–436.
- 689 Cang, J., Kaneko, M., Yamada, J., Woods, G., Stryker, M.P., Feldheim, D.A., 2005. Ephrin-as guide the  
690 formation of functional maps in the visual cortex. *Neuron* 48, 577–589.
- 691 Caruyer, E., Lenglet, C., Sapiro, G., Deriche, R., 2013. Design of multishell sampling schemes with  
692 uniform coverage in diffusion MRI. *Magn. Reson. Med.* 69, 1534–1540.
- 693 Clavagnier, S., Dumoulin, S.O., Hess, R.F., 2015. Is the cortical deficit in amblyopia due to reduced  
694 cortical magnification, loss of neural resolution, or neural disorganization? *J. Neurosci.* 35,  
695 14740–14755.
- 696 Cooper, M.L., Blasdel, G.G., 1980. Regional variation in the representation of the visual field in the visual  
697 cortex of the Siamese cat. *J. Comp. Neurol.* 193, 237–253.
- 698 Davies-Thompson, J., Scheel, M., Lanyon, L.J., Barton, J.J.S., 2013. Functional organisation of visual  
699 pathways in a patient with no optic chiasm. *Neuropsychologia* 51, 1260–1272.  
700 <https://doi.org/10.1016/j.neuropsychologia.2013.03.014>
- 701 Dumoulin, S.O., Wandell, B.A., 2008. Population receptive field estimates in human visual cortex.  
702 *NeuroImage* 39, 647–660. <https://doi.org/10.1016/j.neuroimage.2007.09.034>
- 703 Fracasso, A., Koenraads, Y., Porro, G.L., Dumoulin, S.O., 2016. Bilateral population receptive fields in  
704 congenital hemihydranencephaly. *Ophthalmic Physiol. Opt.* 36, 324–334.
- 705 Fracasso, A., Luijten, P.R., Dumoulin, S.O., Petridou, N., 2018. Laminar imaging of positive and negative  
706 BOLD in human visual cortex at 7 T. *Neuroimage* 164, 100–111.

- 707 Friston, K.J., Fletcher, P., Josephs, O., Holmes, A., Rugg, M.D., Turner, R., 1998. Event-related fMRI:  
708 characterizing differential responses. *NeuroImage* 7, 30–40.  
709 <https://doi.org/10.1006/nimg.1997.0306>
- 710 Grønskov, K., Ek, J., Brøndum-Nielsen, K., 2007. Oculocutaneous albinism. *Orphanet J. Rare Dis.* 2, 43.
- 711 Guillery, R.W., Hickey, T.L., Kaas, J.H., Felleman, D.J., Debruyn, E.J., Sparks, D.L., 1984. Abnormal  
712 central visual pathways in the brain of an albino green monkey (*Cercopithecus aethiops*). *J. Comp.*  
713 *Neurol.* 226, 165–183. <https://doi.org/10.1002/cne.902260203>
- 714 Haak, K.V., Winawer, J., Harvey, B.M., Renken, R., Dumoulin, S.O., Wandell, B.A., Cornelissen, F.W.,  
715 2013. Connective field modeling. *Neuroimage* 66, 376–384.
- 716 Han, X., Pham, D.L., Tosun, D., Rettmann, M.E., Xu, C., Prince, J.L., 2004. CRUISE: cortical  
717 reconstruction using implicit surface evolution. *NeuroImage* 23, 997–1012.
- 718 Harvey, B.M., Dumoulin, S.O., 2011. The relationship between cortical magnification factor and  
719 population receptive field size in human visual cortex: constancies in cortical architecture. *J.*  
720 *Neurosci. Off. J. Soc. Neurosci.* 31, 13604–13612. [https://doi.org/10.1523/JNEUROSCI.2572-](https://doi.org/10.1523/JNEUROSCI.2572-11.2011)  
721 11.2011
- 722 Hoffmann, M.B., Dumoulin, S.O., 2015. Congenital visual pathway abnormalities: a window onto cortical  
723 stability and plasticity. *Trends Neurosci.* 38, 55–65. <https://doi.org/10.1016/j.tins.2014.09.005>
- 724 Hoffmann, M.B., Kaule, F.R., Levin, N., Masuda, Y., Kumar, A., Gottlob, I., Horiguchi, H., Dougherty,  
725 R.F., Stadler, J., Wolynski, B., Speck, O., Kanowski, M., Liao, Y.J., Wandell, B.A., Dumoulin,  
726 S.O., 2012. Plasticity and stability of the visual system in human achiasma. *Neuron* 75, 393–401.  
727 <https://doi.org/10.1016/j.neuron.2012.05.026>
- 728 Hoffmann, M.B., Seufert, P.S., Schmidtborn, L.C., 2007. Perceptual relevance of abnormal visual field  
729 representations: static visual field perimetry in human albinism. *Br. J. Ophthalmol.* 91, 509–513.  
730 <https://doi.org/10.1136/bjo.2006.094854>
- 731 Hoffmann, M.B., Tolhurst, D.J., Moore, A.T., Morland, A.B., 2003. Organization of the visual cortex in  
732 human albinism. *J. Neurosci. Off. J. Soc. Neurosci.* 23, 8921–8930.
- 733 Horton, J.C., Hocking, D.R., 1996. Pattern of ocular dominance columns in human striate cortex in  
734 strabismic amblyopia. *Vis. Neurosci.* 13, 787–795.
- 735 Huberman, A.D., Feller, M.B., Chapman, B., 2008. Mechanisms underlying development of visual maps  
736 and receptive fields. *Annu Rev Neurosci* 31, 479–509.
- 737 In, M.-H., Speck, O., 2012. Highly accelerated PSF-mapping for EPI distortion correction with improved  
738 fidelity. *Magn. Reson. Mater. Phys. Biol. Med.* 25, 183–192.
- 739 Jeurissen, B., Tournier, J.-D., Dhollander, T., Connelly, A., Sijbers, J., 2014. Multi-tissue constrained  
740 spherical deconvolution for improved analysis of multi-shell diffusion MRI data. *NeuroImage*  
741 103, 411–426.
- 742 Kaule, F.R., Wolynski, B., Gottlob, I., Stadler, J., Speck, O., Kanowski, M., Meltendorf, S., Behrens-  
743 Baumann, W., Hoffmann, M.B., 2014. Impact of chiasma opticum malformations on the  
744 organization of the human ventral visual cortex. *Hum. Brain Mapp.* 35, 5093–5105.  
745 <https://doi.org/10.1002/hbm.22534>
- 746 Kemper, V.G., De Martino, F., Emmerling, T.C., Yacoub, E., Goebel, R., 2018. High resolution data  
747 analysis strategies for mesoscale human functional MRI at 7 and 9.4 T. *NeuroImage* 164, 48–58.
- 748 Klein, B.P., Fracasso, A., van Dijk, J.A., Paffen, C.L., Te Pas, S.F., Dumoulin, S.O., 2018. Cortical depth  
749 dependent population receptive field attraction by spatial attention in human V1. *NeuroImage*  
750 176, 301–312.

- 751 Klemen, J., Hoffmann, M.B., Chambers, C.D., 2012. Cortical plasticity in the face of congenitally altered  
752 input into V1. *Cortex J. Devoted Study Nerv. Syst. Behav.* 48, 1362–1365.  
753 <https://doi.org/10.1016/j.cortex.2012.03.012>
- 754 McLaughlin, T., O’Leary, D.D., 2005. Molecular gradients and development of retinotopic maps. *Annu*  
755 *Rev Neurosci* 28, 327–355.
- 756 Muckli, L., Naumer, M.J., Singer, W., 2009. Bilateral visual field maps in a patient with only one  
757 hemisphere. *Proc. Natl. Acad. Sci.* 106, 13034–13039. <https://doi.org/10.1073/pnas.0809688106>
- 758 Nguyen, C.T., Goh, C., Desmond, P., Abel, L.A., Lim, C.H., Symons, R.A., Hardy, T.G., 2018.  
759 Congenital achiasma and see-saw nystagmus in VATER syndrome association with  
760 hydrocephalus. *J. Clin. Neurosci.* 51, 63–65.
- 761 Olman, C.A., Bao, P., Engel, S.A., Grant, A.N., Purington, C., Qiu, C., Schallmo, M.-P., Tjan, B.S., 2016.  
762 Hemifield columns co-opt ocular dominance column structure in human achiasma. *Neuroimage.*
- 763 Pelli, D.G., 1997. The VideoToolbox software for visual psychophysics: transforming numbers into  
764 movies. *Spat. Vis.* 10, 437–442.
- 765 Saad, Z.S., Glen, D.R., Chen, G., Beauchamp, M.S., Desai, R., Cox, R.W., 2009. A new method for  
766 improving functional-to-structural MRI alignment using local Pearson correlation. *Neuroimage*  
767 44, 839–848.
- 768 Smith, R.E., Tournier, J.-D., Calamante, F., Connelly, A., 2012. Anatomically-constrained tractography:  
769 improved diffusion MRI streamlines tractography through effective use of anatomical  
770 information. *Neuroimage* 62, 1924–1938.
- 771 Takemura, H., Caijafa, C.F., Wandell, B.A., Pestilli, F., 2016. Ensemble tractography. *PLoS Comput. Biol.*  
772 12, e1004692.
- 773 Tootell, R.B., Mendola, J.D., Hadjikhani, N.K., Liu, A.K., Dale, A.M., 1998. The representation of the  
774 ipsilateral visual field in human cerebral cortex. *Proc. Natl. Acad. Sci.* 95, 818–824.
- 775 Tournier, J.-D., Calamante, F., Connelly, A., 2013. Determination of the appropriate b value and number  
776 of gradient directions for high-angular-resolution diffusion-weighted imaging. *NMR Biomed.* 26,  
777 1775–1786.
- 778 Tournier, J.D., Calamante, F., Connelly, A., 2010. Improved probabilistic streamlines tractography by 2nd  
779 order integration over fibre orientation distributions, in: *Proceedings of the International Society*  
780 *for Magnetic Resonance in Medicine.* p. 1670.
- 781 Tournier, J.-D., Yeh, C.-H., Calamante, F., Cho, K.-H., Connelly, A., Lin, C.-P., 2008. Resolving crossing  
782 fibres using constrained spherical deconvolution: validation using diffusion-weighted imaging  
783 phantom data. *Neuroimage* 42, 617–625.
- 784 Tuch, D.S., Reese, T.G., Wiegell, M.R., Makris, N., Belliveau, J.W., Wedeen, V.J., 2002. High angular  
785 resolution diffusion imaging reveals intravoxel white matter fiber heterogeneity. *Magn. Reson.*  
786 *Med. Off. J. Int. Soc. Magn. Reson. Med.* 48, 577–582.
- 787 Van de Moortele, P.-F., Auerbach, E.J., Olman, C., Yacoub, E., Uğurbil, K., Moeller, S., 2009. T1  
788 weighted brain images at 7 Tesla unbiased for Proton Density, T2\* contrast and RF coil receive  
789 B1 sensitivity with simultaneous vessel visualization. *Neuroimage* 46, 432–446.
- 790 Victor, J.D., Apkarian, P., Hirsch, J., Conte, M.M., Packard, M., Relkin, N.R., Kim, K.H., Shapley, R.M.,  
791 2000. Visual function and brain organization in non-decussating retinal-fugal fibre syndrome.  
792 *Cereb. Cortex N. Y. N* 1991 10, 2–22.
- 793 von dem Hagen, E.A.H., Hoffmann, M.B., Morland, A.B., 2008. Identifying human albinism: a  
794 comparison of VEP and fMRI. *Invest. Ophthalmol. Vis. Sci.* 49, 238–249.  
795 <https://doi.org/10.1167/iovs.07-0458>

- 796 Waehnert, M.D., Dinse, J., Weiss, M., Streicher, M.N., Waehnert, P., Geyer, S., Turner, R., Bazin, P.-L.,  
797 2014. Anatomically motivated modeling of cortical laminae. *Neuroimage* 93, 210–220.  
798 Wandell, B.A., Chial, S., Backus, B.T., 2000. Visualization and measurement of the cortical surface. *J.*  
799 *Cogn. Neurosci.* 12, 739–752.  
800 Wandell, B.A., Dumoulin, S.O., Brewer, A.A., 2007. Visual field maps in human cortex. *Neuron* 56, 366–  
801 383.  
802 Weber, K.P., Landau, K., 2013. Teaching NeuroImages: Mind the gap! Postfixational blindness due to  
803 traumatic rupture of the optic chiasm. *Neurology* 80, e197–e198.  
804

## 805 **Supplementary figures**

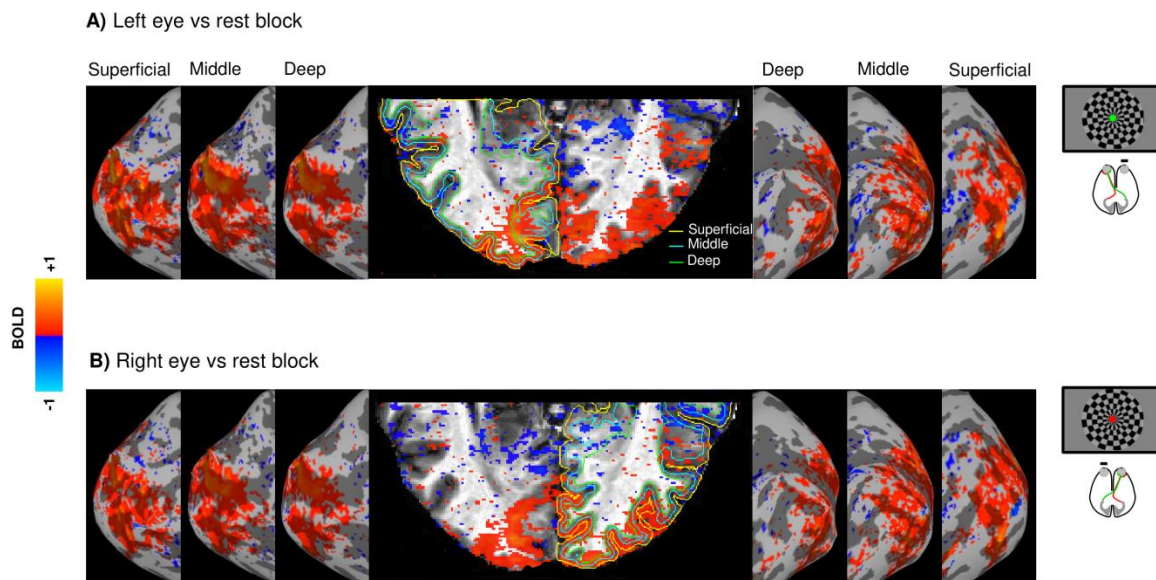

- 806
- 807 **Figure S1: Cortical response lateralization during bilateral stimulation of each eye in a**  
808 **control participant.** The cortical activation is projected onto a clipped anatomical image of the  
809 occipital cortex and onto the inflated cortical surfaces of the deep, middle, and superficial layers.  
810 Both left (A) and right (B) eye stimulation vs rest elicit bilateral activation. Conventions as for  
811 Figure 1.  
812



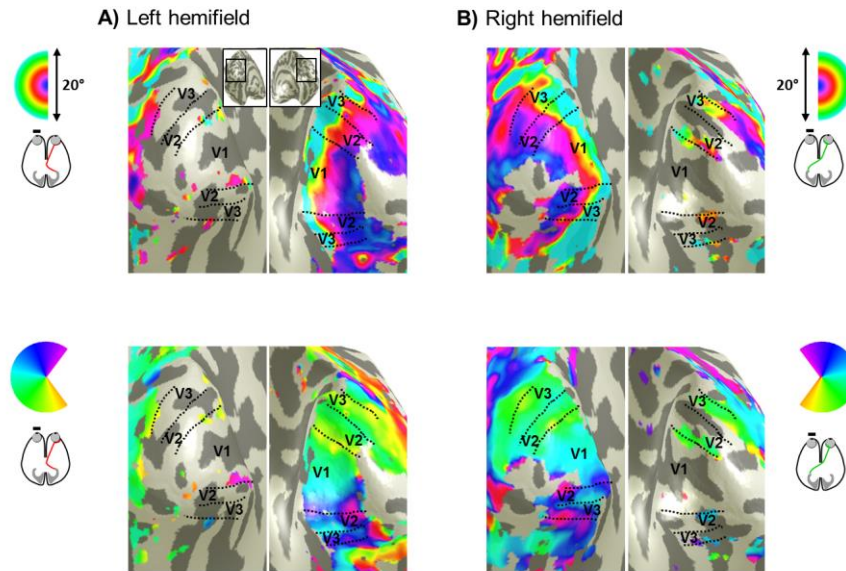

813

814 **Figure S2: Visual field representations for unilateral stimulation of the right eye in a**  
 815 **control participant.** Eccentricity (top row) and polar angle maps (bottom row) on the inflated  
 816 occipital cortex for left (A) and right (B) hemifield stimulation. In both cases, orderly eccentricity  
 817 and polar angle maps were obtained predominantly on the hemisphere contralateral to the  
 818 stimulated hemifield. Residual ipsilateral representations of the vertical meridians and fovea were  
 819 observed in V1-V3 as reported previously (Hoffmann et al., 2003; Tootell et al., 1998). Note that  
 820 this residual representation is clearly different from the additional third hemifield map in CHP  
 821 (Figure 3D) which is more widespread and follows a retinotopic progression.  
 822

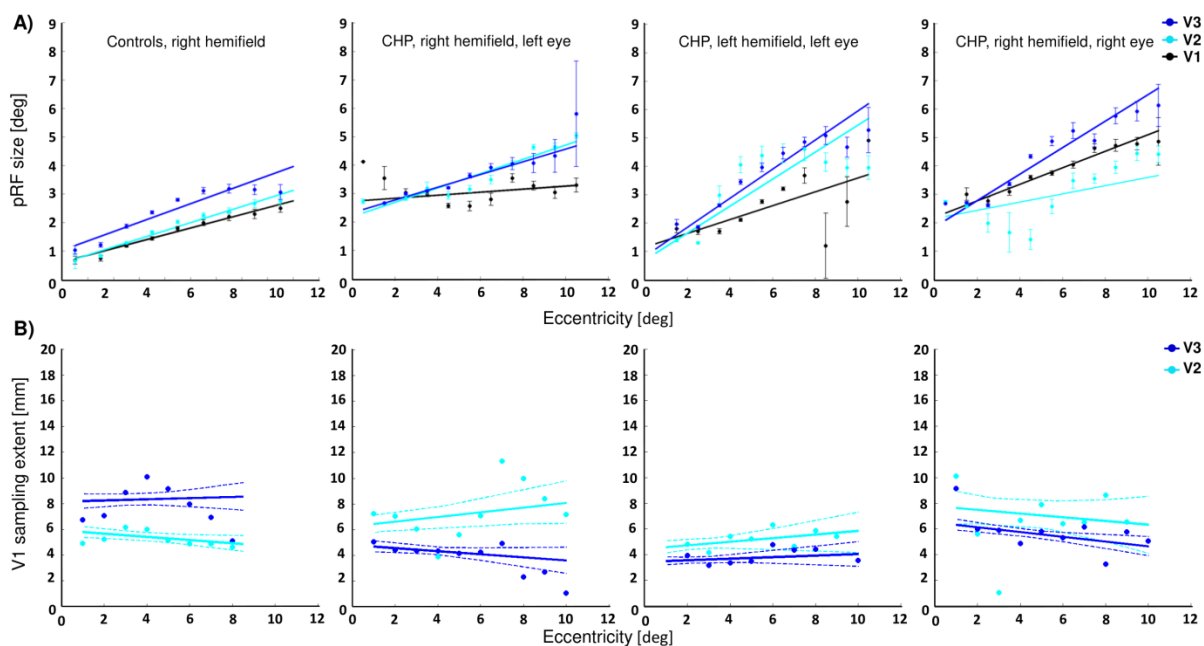

823

824 **Figure S3: Dependence of pRF size and CF size on eccentricity.** A) Comparison of the pRF  
 825 sizes in V1-V3 between the three maps of CHP (middle and right panels) and the average pRF  
 826 size estimates from 4 controls obtained under right hemifield mapping (left panel). The ROIs in

827 CHP were restricted to the region with the overlap of all three maps ( $ROI_{3maps}$ ). For both maps  
828 from the left eye (middle panels), the pRF sizes increase as a function of eccentricity and through  
829 the visual hierarchy (similar to the controls). This expansion through the visual areas is most  
830 evident from V1 (black) to V2 (cyan) and V1 to V3 (blue), whereas the difference in pRF sizes of  
831 V2 and V3 is smaller. A similar pattern is observed for the right hemifield map of the right eye  
832 (right panel), except for V2 where the pRF size is not increased across visual hierarchy (i.e., V2  
833 pRF size < V1 pRF size). This might be associated with the lower VE and the lower relative  
834 activated area in V2 (see Figure 4). **B)** Comparison of V1-referred CF sizes in V2 (cyan) and V3  
835 (blue) between three maps of CHP (middle and right panels) and the average V1-referred CF size  
836 estimates from 4 controls obtained for right hemifield mapping (left panel). The ROIs in CHP  
837 were restricted to the region with the overlap of all three maps ( $ROI_{3maps}$ ). The CF size is plotted  
838 as a function of eccentricity after adjusting for pRF laterality (Haak et al., 2013). This yields V1  
839 sampling extent which is roughly constant across eccentricities, but increases through the visual  
840 hierarchy in the control data. For all three maps of CHP, however, V1 sampling extent in V3 is  
841 smaller than that in V2. This alteration might suggest a reduction in spatial coupling between V1  
842 and V3 regions that receive triple hemifield input. Solid lines demonstrate the linear fits for the  
843 dots and the dashed lines correspond to the 95% bootstrapped confidence interval of the linear  
844 fits.

845  
846

A) Even runs; left eye vs right eye

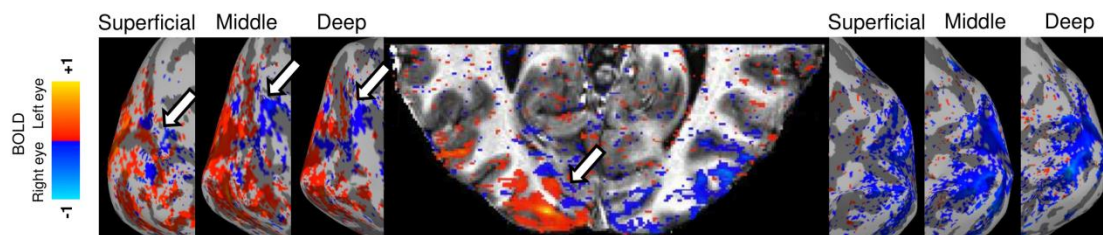

B) Odd runs; left eye vs right eye

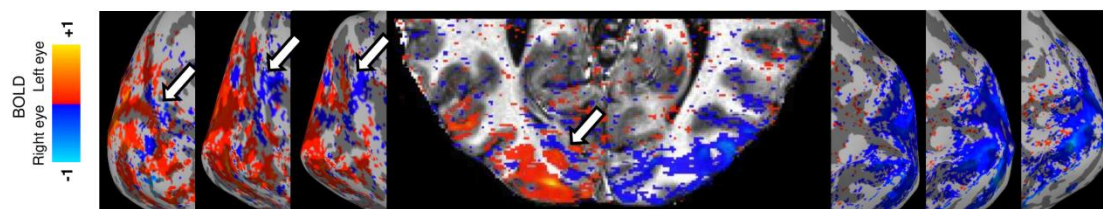

847 **Figure S4: Response to left vs right eye stimulation for split data-set (even and odd runs).**  
848 Similar patterns were observed for both halves of the data, indicating within-session consistency.  
849 Conventions as for Figure 6.

851
